# Supplementary material for: Proxy evidence for state-dependence of climate sensitivity in the Eocene greenhouse
Source: PubMed Central journal article supplement (PMC7477227; doi:10.1038/s41467-020-17887-x), 2020-09-07
Supplement: 41467_2020_17887_MOESM2_ESM.pdf [file 41467_2020_17887_MOESM2_ESM.pdf]

## Description of Additional Supplementary Files

**File Name:** Supplementary Data 1

**Description:** Site core information, foraminifera samples, analyses, and calculations.

**File Name:** Supplementary Data 2

**Description:** Global Mean Temperature (GMT) estimates, CO<sub>2</sub> forcing relative to preindustrial, and climate sensitivity calculations.

**File Name:** Supplementary Data 3.

**Description:** Reprocessed  $\delta^{11}\text{B}$  data for atmospheric CO<sub>2</sub> and seawater pH from planktonic foraminifera. Note that for this processing, no vital effect corrections are applied, and temperature is based on Mg/Ca or  $\delta^{18}\text{O}$  measurements in the respective references, treated the same way as for the rest of the time series in this paper.
