# Supplementary material for: Proxy evidence for state-dependence of climate sensitivity in the Eocene greenhouse
Source: Nat Commun. 2020 Sep 7;11:4436. doi: 10.1038/s41467-020-17887-x (PMC7477227; doi:10.1038/s41467-020-17887-x)
Supplement: Supplementary file 4 — Supplementary Data 2 [file 41467_2020_17887_MOESM4_ESM.xlsx]

## Sheet: Table 2
Supplementary Data 2: Global Mean Temperature (GMT) estimates, CO2 forcing relative to preindustrial, and climate sensitivity calculations
					Estimates using the GMTs from Ref. 8								Estimates using the GMTs estimated here from the sea surface temperature record of Ref. 1
					Earth System Sensitivity (ESS)				Equilibrium Climate Sensitivity (ECS)				ESS (oC per doubling of CO2)				ECS (oC per doubling CO2)
					(oC per doubling of CO2)
Age (Ma)	ΔFCO2 (W m^-2)	1 s.d.	GMT (oC)	1 s.d.	Median	1 s.d.	0.68	0.32	Median	1 s.d.	0.68	0.32	Median	1 s.d.	0.68	0.32	Median	1 s.d.	0.68	0.32
32.98	4.01513	0.568893	17.1304	3.65023									2.20061	3.59378	3.85352	0.400604
33.17	5.52662	0.565568	17.5649	3.48024									1.81323	2.44027	2.86009	0.66048
33.33	6.9619	0.534916	17.3213	3.54967									1.44229	1.89379	2.19161	0.51485
33.38	7.20544	0.647099	17.4323	3.60994									1.41819	1.92053	2.38535	0.415969
33.59	5.40908	0.495335	16.7047	3.55461									1.17259	2.56099	2.41778	0.0311296
33.96	7.1337	0.539831	18.598	3.55845									1.88121	1.93464	2.90858	1.09006
34.21	7.45936	0.56727	18.0142	3.48833									1.6307	1.69547	2.35411	0.792763
34.42	7.33789	0.755735	18.0142	3.48833									1.6397	1.81664	2.50198	0.847845
34.63	6.27949	0.770386	18.2595	3.47831									2.00442	2.19153	2.96651	1.02444
35.6075	6.81732	0.541208	19.8388	3.65889	2.44686	2	3.52371	1.64082	1.70632	2.01147	2.6028	0.854642	2.77114	1.96707	3.63829	1.74836	2.04926	1.9801	2.83796	1.1503
36.3964	6.53447	0.616238	18.9544	3.54481									2.3619	2.12391	3.39004	1.36384	1.36911	2.07768	2.34165	0.564678
36.9	6.04698	0.760222	19.5833	3.53847									2.84615	2.31525	3.96181	1.81859	1.94245	2.23176	2.78841	0.908335
36.9633	6.64415	0.586446	20.0801	3.56651									2.69456	2.05616	3.69268	1.85777	2.14517	2.04975	3.03667	1.07582
36.9633	6.27241	0.558392	20.0801	3.56651									3.10818	2.29966	4.3702	2.03446	2.12038	2.12034	3.00834	1.19101
37.6361	6.00934	1.2098	20.3708	3.51185									3.47553	2.52735	4.627	2.34153	2.54038	2.48866	3.71537	1.52807
38.1094	6.75158	0.668122	19.5249	3.61431									2.37347	2.0439	3.16859	1.46717	1.44259	2.05593	2.52662	0.552107
38.7811	6.72028	0.485533	19.99	3.78731	3.19001	2.0862	4.12334	2.24483	2.34052	2.10388	3.29584	1.37512	2.61105	2.16332	3.75028	1.57101	1.68372	2.06006	2.68822	0.712949
38.7811	6.6514	0.531546	19.99	3.78731	3.2555	2.22058	4.37585	2.27527	2.23515	2.12356	3.16816	1.15221	2.60361	2.19543	3.58131	1.60117	1.68263	2.13204	2.70106	0.688444
38.7811	7.08753	0.621459	19.99	3.78731	3.11445	2.08177	4.04222	2.1836	2.15352	2.02347	3.13375	1.19687	2.42128	2.13185	3.34641	1.45086	1.50827	2.0375	2.52186	0.545502
38.7811	7.0717	0.540633	19.99	3.78731	3.0142	2.09773	4.01827	1.97897	2.21431	1.93826	3.15818	1.37927	2.49099	1.97678	3.38675	1.58567	1.72094	2.10925	2.65076	0.75744
39.1236	5.94885	0.535422	20.0922	3.63927									3.04343	2.31136	4.15582	1.93733	1.99399	2.31655	3.09587	0.874536
39.3274	6.78143	0.556528	20.7268	3.63659									3.00067	2.12049	4.01216	2.01311	2.08595	2.05535	2.99215	1.06675
39.446	5.96851	0.651517	21.4062	3.68202									3.70563	2.33392	4.90919	2.68811	2.99823	2.35167	4.03246	1.80746
39.446	7.09731	0.566014	21.4062	3.68202									3.1204	2.00569	4.12562	2.25007	2.41771	1.91094	3.4086	1.64044
39.8079	7.93874	0.59938	22.8101	3.68757									3.475	1.73475	4.32939	2.76251	2.80728	1.84826	3.71506	1.95131
39.911	6.70799	0.53264	23.7658	3.99372									4.81596	2.27127	5.83501	3.8172	3.774	2.23415	4.76571	2.72604
39.9581	6.95612	0.529326	25.0108	4.14954									5.20107	2.25674	6.16619	4.10575	4.50263	2.30807	5.48396	3.44456
39.9827	6.55431	0.511098	26.09	3.94746									6.01834	2.30461	7.18534	4.93129	5.27957	2.32143	6.25235	4.17531
40.0002	6.73102	0.52808	26.09	3.94746									5.96426	2.2589	7.08877	4.92216	5.22098	2.25374	6.40383	4.16055
40.0312	7.78453	0.543113	26.09	3.94746									5.20682	1.99393	6.03294	4.27488	4.43787	1.97179	5.36563	3.52336
40.0615	8.50199	0.657653	26.4112	4.02057									5.08095	1.84702	5.86943	4.18225	4.13379	1.80527	4.94505	3.30303
40.0922	9.45017	0.629658	26.7323	4.09369									4.49135	1.65374	5.35533	3.7223	3.90278	1.70536	4.70842	3.13204
40.1109	8.60747	0.513598	26.7323	4.09369									4.96229	1.76356	5.75126	4.09938	4.28044	1.81069	5.14635	3.452
40.1397	9.62785	0.557824	24.9609	4.00424									3.73138	1.62856	4.46581	2.96821	3.01821	1.52963	3.75868	2.35311
40.1397	9.34459	0.615132	24.9609	4.00424									3.8634	1.69682	4.71453	3.07341	3.33061	1.66357	4.15425	2.602
40.1687	11.4135	0.778151	24.9609	4.00424									3.18472	1.33388	3.78933	2.66247	2.7877	1.37163	3.39454	2.15103
40.2444	7.02267	0.509165	24.9609	4.00424									5.21643	2.27705	6.25904	4.19386	4.31244	2.19978	5.35348	3.33275
40.2502	7.17999	0.491768	24.9609	4.00424									5.09258	2.21761	6.05323	3.9744	4.28393	2.17517	5.31694	3.24198
40.2506	7.19019	0.625798	24.2313	3.86088									4.74147	2.13041	5.66114	3.75876	3.81417	2.07069	4.853	2.87722
40.3	5.05538	0.596813	24.2313	3.86088									6.59118	3.09469	8.12894	5.24968	5.37641	2.96405	6.81488	4.1072
40.3094	7.18834	0.468429	24.2313	3.86088									4.62789	2.05213	5.60742	3.66749	3.88493	2.07388	4.91034	2.95228
40.338	7.449	0.508244	24.2313	3.86088									4.50123	1.96566	5.43168	3.55641	3.69143	1.97159	4.56659	2.78021
40.3777	6.87416	0.542795	23.5017	3.71752									4.44983	2.06841	5.53792	3.58355	3.59062	2.13386	4.63835	2.6921
40.3941	7.03594	0.556318	23.5017	3.71752									4.43741	2.07764	5.44253	3.40397	3.49104	2.01987	4.34985	2.47508
40.5168	7.48905	0.615613	21.8173	3.70283									3.38864	1.89249	4.17848	2.53755	2.55925	1.85634	3.41216	1.72667
40.5172	7.04656	0.542732	21.8173	3.70283									3.39214	2.10686	4.39103	2.36883	2.80115	1.99433	3.75832	1.81064
40.6292	8.24081	0.559758	21.3351	3.73462									2.86602	1.69493	3.54649	2.00512	2.01533	1.71329	2.76702	1.24701
40.6489	6.77347	0.54774	21.3351	3.73462									3.27475	2.16733	4.2404	2.32806	2.47537	2.07118	3.38538	1.57608
40.8103	7.99582	0.591092	21.114	3.71015									2.54837	1.82491	3.42551	1.71513	1.9421	1.7407	2.78789	1.222
40.9178	6.50711	0.560477	21.9048	3.7924									3.83006	2.30105	4.84554	2.82523	2.89426	2.31633	4.10036	1.79875
40.9205	7.08265	0.532354	21.9048	3.7924									3.59255	2.02704	4.45485	2.64525	2.63379	2.02712	3.56208	1.66679
40.933	6.90356	0.513439	21.9048	3.7924									3.56969	2.19726	4.46211	2.40823	2.82284	2.0781	3.71415	1.84629
41.0123	8.46345	0.561354	21.2181	3.67452									2.68745	1.65814	3.41483	1.87169	1.80236	1.64245	2.61071	1.06724
41.1296	6.51095	0.506973	20.7506	3.53264									3.19322	2.16474	4.17883	2.15249	2.09695	1.96662	3.02459	1.22947
41.4678	7.21094	0.545226	22.4462	3.81612									3.42468	1.95357	4.40671	2.62299	2.84053	2.05921	3.75959	1.86888
41.5295	6.30644	0.533091	22.4462	3.81612									4.02853	2.36996	5.25666	2.93616	3.18153	2.28474	4.2379	2.13502
41.796	5.96213	0.504659	23.032	3.78011									4.83545	2.45185	6.11197	3.70951	4.00691	2.48115	5.05813	2.76617
42.3874	6.67548	0.564704	25.3255	3.97139									5.45966	2.26853	6.6101	4.4937	4.65008	2.29859	5.73293	3.57524
43.068	7.04763	0.577057	22.7801	3.78555									3.92868	2.09027	4.84935	2.93703	3.18352	2.06397	4.12973	2.27466
43.068	7.15887	0.524527	22.7801	3.78555									3.90653	1.99648	4.72406	2.86566	2.93265	2.04464	3.98846	2.10904
43.3836	6.50342	0.504757	23.2516	3.65132									4.5696	2.14861	5.50128	3.56175	3.52283	2.11805	4.563	2.5436
43.7442	7.70811	0.535889	25.3395	3.79469									4.76679	1.87932	5.7362	3.92151	4.15602	1.91063	5.01192	3.32861
43.763	7.54429	0.548848	25.3395	3.79469									4.87693	2.00114	5.86126	3.98619	4.05985	1.95208	5.02329	3.22146
44.4	7.21899	0.550976	25.2688	3.96193	3.44657	2.151	4.48864	2.40199	2.62398	2.11973	3.68062	1.70933	5.06317	2.08926	6.06223	4.14597	4.25317	2.2146	5.32046	3.17887
44.5376	7.83204	0.554657	26.0886	4.0196									5.02507	1.95834	5.81005	4.03636	4.28052	1.99002	5.17418	3.45505
44.825	6.95769	0.55657	23.6743	3.81443									4.37427	1.99634	5.46514	3.44304	3.68269	2.15345	4.66479	2.54158
44.8734	7.50761	0.518081	23.8447	3.86955									4.13513	2.06765	5.13799	3.18871	3.47419	1.91142	4.30528	2.62306
44.8734	7.57319	0.536057	23.8447	3.86955									4.00415	2.02241	4.98173	3.17345	3.34714	1.92085	4.24257	2.46187
44.8734	6.73309	0.560817	23.8447	3.86955									4.59027	2.26001	5.60071	3.68556	3.73149	2.24003	4.83207	2.72466
44.8734	6.59201	0.567473	23.8447	3.86955									4.80136	2.2703	5.84336	3.62591	3.88665	2.23188	4.91515	2.90326
45.2048	7.13541	0.493734	25.0622	3.84701									5.02857	2.02742	6.01229	4.0775	4.23659	2.02027	5.18049	3.34884
45.2048	8.13146	0.56564	25.0622	3.84701									4.3635	1.86818	5.25883	3.55558	3.79937	1.80846	4.60655	3.00834
45.6	8.10258	0.58102	24.0378	3.82445									3.84932	1.79187	4.77764	3.05639	3.21344	1.81436	4.13555	2.48241
45.701	6.40357	0.416997	24.0378	3.82445									4.89966	2.24048	5.90312	3.87579	3.9921	2.15011	4.97839	3.026
45.7536	7.58263	0.532955	24.4244	3.85028									4.35111	1.99368	5.314	3.52756	3.62431	1.96324	4.55573	2.71334
46.3171	7.46054	0.575902	24.811	3.8761									4.62338	2.0542	5.60052	3.72783	4.00411	1.95775	4.86822	3.09299
46.571	7.95052	0.476805	24.811	3.8761									4.27504	1.88042	5.28573	3.48689	3.58914	1.85554	4.49153	2.77805
46.6552	7.19611	0.530395	24.811	3.8761									4.8593	2.08444	5.86288	3.94791	4.11431	2.07904	5.01429	3.17307
47.3313	7.86579	0.481944	25.1073	3.9563									4.6056	1.96797	5.50345	3.75339	3.93427	1.96688	4.84502	3.07902
47.496	9.70465	0.601032	25.1073	3.9563									3.68754	1.56086	4.43382	2.99773	3.18287	1.57809	3.85702	2.41589
48.0154	8.2591	0.485078	25.4037	4.03651									4.20737	1.86645	5.08242	3.46981	3.668	1.8975	4.5709	2.71616
48.0154	7.64556	0.568029	25.4037	4.03651									4.68899	2.07117	5.73497	3.66582	4.00425	2.00391	4.94175	3.03232
48.1125	7.25727	0.805092	25.4037	4.03651									5.00782	2.21559	5.98766	3.86838	4.18511	2.2565	5.18595	3.11993
48.137	11.6433	0.712621	25.4037	4.03651									2.96967	1.31741	3.6503	2.34843	2.55392	1.29579	3.12867	1.99366
49.001	11.0957	0.6869	26.0462	4.00801									3.31743	1.37033	3.8924	2.70329	2.96323	1.37288	3.54677	2.30311
49.1345	8.5053	0.592105	26.0462	4.00801									4.53587	1.77789	5.37495	3.70734	3.65148	1.82143	4.5913	2.92318
49.8186	8.10035	0.66735	28.4193	4.22451									5.81244	2.07151	6.7844	4.98977	5.2964	2.02086	6.09101	4.27722
49.831	8.72708	0.620326	28.4193	4.22451									5.40079	1.92545	6.237	4.5409	4.79439	1.87797	5.67501	3.91777
49.9907	9.92078	0.749036	28.6522	4.22996									4.83952	1.64662	5.62127	4.0954	4.27016	1.57718	5.03005	3.50971
49.9907	10.0173	0.91691	28.6522	4.22996									4.79638	1.67963	5.56719	3.97383	4.22027	1.62215	4.99296	3.57371
50.5416	12.3544	0.960475	28.0157	4.18477									3.70391	1.29142	4.32619	3.08113	3.16074	1.26073	3.75234	2.60187
50.5938	12.3956	1.27687	28.0157	4.18477									3.68354	1.39169	4.34857	3.05537	3.21706	1.35376	3.87468	2.56689
50.6032	12.3094	0.929616	28.0157	4.18477									3.66573	1.26585	4.28962	3.08709	3.29072	1.34809	3.92909	2.66755
50.6032	12.7794	1.24955	28.0157	4.18477									3.61988	1.35997	4.25311	3.02066	3.04162	1.29375	3.60188	2.48968
50.6222	12.429	0.988619	28.0157	4.18477									3.62397	1.32044	4.276	3.02192	3.18503	1.28402	3.80099	2.60026
50.683	11.0058	0.746237	28.0157	4.18477									4.19281	1.51043	4.84279	3.46953	3.63299	1.3642	4.24906	2.91956
50.705	8.36122	0.537602	27.9876	4.14189									5.42396	1.95261	6.28659	4.48088	4.92615	1.90789	5.79296	3.96158
50.856	8.24692	0.550638	27.9876	4.14189									5.50864	1.95009	6.32682	4.62292	4.95728	1.93966	5.88274	3.98256
51.2885	11.4861	0.880415	29.6731	4.34091									4.43911	1.52902	5.09396	3.70434	4.05802	1.49335	4.82321	3.34739
51.6049	8.14273	0.857194	29.4132	4.27521									6.3004	2.14375	7.26297	5.30163	5.65649	2.06606	6.55014	4.64414
51.6315	8.92945	0.791198	29.4132	4.27521									5.68241	1.86218	6.53547	4.91881	5.03379	1.84118	5.85091	4.22523
51.6315	9.26628	0.944654	29.4132	4.27521									5.47355	1.86611	6.31445	4.63216	4.85766	1.79123	5.70197	4.04
51.6581	10.7638	0.904657	29.4132	4.27521									4.68266	1.58181	5.4071	3.94205	4.22416	1.51968	4.90864	3.51741
51.6581	9.95791	0.798107	29.4132	4.27521									5.16541	1.7147	5.91045	4.43337	4.53339	1.64271	5.29026	3.71639
51.6581	9.65498	0.843559	29.4132	4.27521									5.26769	1.74538	6.07744	4.37925	4.68995	1.7579	5.38272	3.84245
51.7112	11.5629	1.05405	29.0837	4.12342									4.21813	1.40243	4.89709	3.65587	3.80672	1.35627	4.44588	3.19709
51.98	9.03625	0.620389	29.3512	4.27065	3.05388	1.80387	3.90398	2.20009	2.5245	1.81448	3.3948	1.594	5.55677	1.80238	6.44846	4.79674	5.0307	1.79014	5.83474	4.16285
51.98	7.52646	0.555364	29.3512	4.27065	3.78475	2.2573	4.82138	2.74354	2.96898	2.12661	3.95811	1.89622	6.77446	2.25365	7.86182	5.70052	6.06894	2.24001	7.05256	5.06885
52.8817	8.97149	0.871954	29.3246	4.21043									5.46699	1.86561	6.34559	4.73747	4.97194	1.866	5.75951	4.09226
52.8817	7.03713	0.71183	29.3246	4.21043									7.34781	2.48232	8.36317	6.11491	6.5603	2.34914	7.64985	5.45596
53.2	9.72182	0.625673	29.3246	4.21043									5.22068	1.66858	5.98884	4.42653	4.68594	1.71639	5.4758	3.88687
53.628	7.59561	0.593402
53.8715	6.5294	0.717941
53.9422	5.13134	0.700517
53.9526	7.71815	0.73935
53.963	6.07135	0.688078
53.9633	6.62071	0.993141
53.9693	4.07383	0.605618
53.9741	7.30343	1.83883
53.9866	7.94434	1.06269
54.0078	6.57067	0.659429
54.0174	9.06554	1.08649
54.0268	10.0422	0.727844
54.0381	8.64871	0.752431
54.039	6.56395	0.727394
54.0441	7.31471	0.470827
54.0469	3.02005	1.04536
54.0472	2.99866	1.03515
54.0477	5.58717	0.484995
54.049	12.7901	2.41155
54.0497	8.6342	0.916592
54.0497	7.16104	1.79747
54.05	4.73918	0.539696
54.0502	7.3257	2.75713
54.0508	5.56577	0.685676
54.0514	9.28876	1.51643
54.0515	6.174	0.622
54.0526	4.75226	0.519202
54.0541	3.95712	0.548926
54.0545	4.00771	1.0379
54.0604	3.15686	0.710645
54.0647	2.97436	0.827611
54.0745	3.74327	0.830614
54.0803	4.01484	0.53047
54.088	3.65949	2.29449
54.678	4.75208	0.517951	27.0691	4.07983									8.67173	3.45326	10.3928	7.28295	7.41878	3.33606	9.10263	5.95116
55.3937	9.23572	0.925088
55.4226	9.27447	0.805828
55.4392	9.95164	0.796685
55.4903	8.34811	0.849103
55.512	10.7792	0.829514
55.5226	9.70643	1.06461
55.541	6.02144	0.541024
55.5426	7.1138	0.689791
55.5648	7.40481	0.714959	26.5305	3.87519									5.4043	2.10461	6.49409	4.5304	4.61449	2.1009	5.60843	3.67702
55.5903	6.56172	0.673708	26.5305	3.87519									5.95385	2.38055	7.22468	4.85694	5.08609	2.2324	6.2311	4.18604
55.6115	7.46498	0.662427	28.0388	4.04704									5.78855	2.0805	6.84046	4.93655	4.97026	2.06214	6.00501	4.1278
55.6359	8.20536	0.776631	28.0388	4.04704									5.19548	1.97279	6.23117	4.32749	4.56151	1.93788	5.49285	3.60829
55.657	7.67338	0.730424	28.0388	4.04704									6.0946	2.14989	7.05256	5.02333	5.19476	2.00149	6.07189	4.2371
55.6781	9.48669	0.769378	37.7178	55.6898									4.72483	21.7485	15.6014	-6.38122	3.47026	21.3396	14.0964	-6.73737
55.6838	7.8377	0.517481	27.6802	4.14758									5.65648	2.0211	6.62069	4.70066	4.82239	2.0077	5.77771	3.96367
55.6993	7.31676	0.688512	27.6802	4.14758									6.24683	2.30413	7.41725	5.25322	5.75478	2.34477	6.7994	4.66825
55.7205	9.8283	1.39209	29.6464	4.18862									5.27558	1.80192	6.16262	4.50918	4.70112	1.8054	5.5094	3.92891
55.7349	9.63027	0.703299	30.0197	4.25362									5.49106	1.71997	6.15153	4.67266	4.87845	1.7222	5.76655	4.06009
55.7405	11.9201	1.0803	29.9833	4.25034									4.43008	1.38023	5.0965	3.84023	4.0458	1.40691	4.67686	3.36502
55.7475	7.1976	0.710864	29.947	4.24705									7.50172	2.39278	8.50529	6.39655	6.51914	2.26503	7.61119	5.50088
55.7603	8.47603	2.58161	29.947	4.24705									6.21465	6.42771	7.57826	5.22385	5.54076	4.06425	7.11649	4.45667
55.7769	8.29444	0.961347	29.947	4.24705									6.30113	2.13076	7.31442	5.33859	5.72878	2.06007	6.64061	4.8519
55.7912	8.73935	0.692541	29.6978	4.20626									5.94285	1.922	6.97017	4.93884	5.27644	1.84255	6.18767	4.39914
55.7975	12.039	0.835219	29.6978	4.20626									4.27232	1.32428	4.8774	3.64811	3.76405	1.36088	4.45519	3.16641
55.808	8.46566	0.840111	29.6978	4.20626									6.21114	1.93828	7.08275	5.24433	5.47276	2.05656	6.45272	4.52799
55.8223	8.54111	0.816314	29.6978	4.20626									6.21654	1.99445	7.06063	5.26674	5.45067	2.03598	6.40984	4.57094
55.8302	8.25626	0.582338
55.8365	11.722	0.793111
55.8368	11.4341	1.35927
55.8434	7.35021	0.602703
55.8513	11.4418	2.33932	29.4486	4.16547									4.43209	1.83252	5.29555	3.7038	3.91085	1.84291	4.7868	3.22852
55.8812	14.2935	1.94073	31.4335	4.48328									4.09621	1.38156	4.70738	3.49545	3.6263	1.32633	4.29873	3.11067
55.8827	10.9538	0.824964	31.1182	4.50571									5.31167	1.60116	6.04417	4.48076	4.61538	1.62575	5.4278	3.88262
55.8916	10.1721	0.901195	31.8519	4.62225									5.88863	1.86594	6.79763	5.05396	5.34088	1.84698	6.20979	4.46697
55.9016	11.7909	0.956093	34.4203	4.88478									5.87545	1.61673	6.67224	5.15395	5.59725	1.70073	6.34578	4.82675
55.9067	6.12627	0.810415	34.2309	4.82843									11.2839	3.4719	12.9325	9.70848	10.2782	3.2799	11.9134	8.81551
55.919	7.97741	0.544787	34.4647	4.79653									8.83474	2.24704	9.77317	7.73706	8.16234	2.30617	9.27314	7.10141
55.9198	5.83498	1.71355	34.4647	4.79653									11.8092	8.35397	14.3552	9.82346	10.878	6.65597	13.3657	8.95438
55.929	5.045	0.684934	34.0076	4.79815									13.5093	4.43911	15.532	11.6412	12.4616	4.11652	14.3713	10.4899
55.939	8.3885	0.849112	34.1278	4.84421									8.10366	2.37409	9.20662	7.04052	7.33809	2.38044	8.56211	6.32243
55.9608	6.74836	0.779792	34.4577	4.9027									10.2577	3.15818	11.7658	8.86275	9.71049	2.98423	10.9661	8.24507
55.9779	6.13554	0.804224	34.2744	4.7045									11.334	3.35212	12.8473	9.91482	10.3835	3.49123	11.9854	8.85904
56.0242	7.15959	0.801993	31.6598	4.58834									8.3432	2.61481	9.4783	7.32249	7.39466	2.64637	8.6395	6.22015
56.0404	9.00409	0.810365	26.797	4.1029									4.40821	1.84316	5.3681	3.64391	3.91865	1.7905	4.76589	3.08033
56.0518	6.0372	0.707631	26.4464	4.12472									6.46133	2.90128	7.79967	5.23107	5.66215	2.7253	6.93361	4.48422
56.066	7.08335	0.543452	26.8256	4.03644									5.84932	2.22164	6.87218	4.72642	4.97516	2.11592	6.10372	3.89688
56.1021	7.92548	0.870627	26.8256	4.03644									5.15079	2.04761	6.06779	4.1852	4.37016	2.04504	5.43943	3.42435
56.1346	6.11471	0.907904	26.8256	4.03644									6.88824	2.76854	8.21253	5.62483	5.76925	2.70942	6.93378	4.4714
56.3369	3.72725	1.21548	26.8256	4.03644									11.0404	16.7433	14.1438	8.86293	9.72462	12.2377	12.4726	7.30223
