# Supplementary material for: Proxy evidence for state-dependence of climate sensitivity in the Eocene greenhouse
Source: Nat Commun. 2020 Sep 7;11:4436. doi: 10.1038/s41467-020-17887-x (PMC7477227; doi:10.1038/s41467-020-17887-x)
Supplement: Supplementary file 5 — Supplementary Data 3 [file 41467_2020_17887_MOESM5_ESM.xlsx]

## Sheet: SD3
Supplementary Data 3: Reprocessed δ11B data for atmospheric CO2 and seawater pH from planktonic foraminifera. Note that for this processing, no vital effect corrections are applied, and temperature is based on Mg/Ca or δ18Ο measurements in the respective references, treated the same way as for the rest of the time series in this paper.
Age (Ma)	CO2 median (ppm)	-2 s.d.	+2 s.d.	pH	-2 s.d.	+2 s.d.	Reference	Site
32.98	573.282	93.2241	118.585	7.86904	0.0319272	0.0337055	4,5	TDP
33.17	734.172	116.502	155.363	7.8128	0.0375045	0.0342996	4,5	TDP
33.33	931.037	164.721	187.533	7.75861	0.0358437	0.0349312	4,5	TDP
33.38	964.471	166.697	226.873	7.76044	0.0405636	0.036121	4,5	TDP
33.59	722.472	119.598	131.732	7.82263	0.035462	0.0298938	4,5	TDP
33.96	952.246	175.132	192.68	7.74844	0.0370959	0.0380193	4,5	TDP
34.21	1007.85	171.033	220.199	7.73532	0.0398969	0.0383991	4,5	TDP
34.42	989.624	204.626	273.983	7.73693	0.050613	0.0456466	4,5	TDP
34.63	837.453	176.481	239.319	7.77906	0.0488688	0.0462786	4,5	TDP
36.9	805.11	185.629	232.716	7.78405	0.0487058	0.0494637	4	TDP
40.3	681.228	121.847	148.708	7.82245	0.0325261	0.0329459	4	TDP
44.4	966.518	176.355	196.366	7.75885	0.037062	0.0371671	4	TDP
45.6	1117.07	217.56	236.115	7.71628	0.0346195	0.0354451	4	TDP
53.2	1431.07	267.994	334.909	7.65057	0.0397261	0.0412651	4	TDP
55.3937	1336.63	303.178	439.105	7.62417	0.0470344	0.0480792	10	401
55.4226	1341.34	274.219	387.535	7.62764	0.043027	0.0492521	10	401
55.4392	1474.93	338.247	430.647	7.6158	0.0466551	0.0521533	10	401
55.4903	1156.24	245.706	363.27	7.65693	0.0439895	0.0513121	10	401
55.512	1692.1	360.231	498.959	7.5739	0.046355	0.0524597	10	401
55.5226	1436.48	389.311	555.889	7.61103	0.0638146	0.0709344	10	401
55.5426	952.376	176.418	231.489	7.70118	0.0388267	0.0410883	10	401
55.5648	997.195	199.393	247.672	7.69603	0.0373107	0.041145	10	401
55.5903	867.318	176.272	219.049	7.7198	0.0393172	0.0400063	10	401
55.6115	1004.11	194.601	242.2	7.68084	0.0432893	0.0382768	10	401
55.6359	1137.57	237.048	328.762	7.66569	0.0470292	0.0464365	10	401
55.657	1046.44	214.255	279.36	7.67655	0.0416035	0.0421464	10	401
55.6781	1388.35	293.794	375.984	7.62382	0.0442114	0.0470438	10	401
55.6993	982.367	222.542	249.947	7.6893	0.0480293	0.0475038	10	401
55.7205	1478	450.674	678.429	7.60527	0.0736195	0.0789844	10	401
55.7349	1409.65	280.587	352.929	7.61403	0.0393605	0.0406747	10	401
55.7405	1996.73	539.39	748.694	7.53386	0.0598703	0.0681062	10	401
55.7475	973.646	216.118	251.678	7.69293	0.0420457	0.0440303	10	401
55.7603	1257.64	460.75	950.97	7.62752	0.0930814	0.118408	10	401
55.7769	1151.97	297.137	423.005	7.65142	0.0572208	0.0638211	10	401
55.7912	1231.94	265.718	297.383	7.63418	0.0434809	0.0447363	10	401
55.808	1191.61	287.376	345.666	7.64547	0.0500264	0.0568769	10	401
55.8223	1201.47	265.515	345.455	7.63398	0.0442254	0.0425031	10	401
55.8302	1140.32	207.27	248.204	7.65351	0.0336115	0.035534	10	401
55.8368	1874.57	555.594	827.855	7.54792	0.0699897	0.0783132	10	401
55.8434	989.759	196.746	219.932	7.68725	0.0393263	0.0363092	10	401
55.8513	1964.02	723.957	1325.27	7.52697	0.0944741	0.107521	10	401
55.8812	2901.36	948.222	1612.32	7.45589	0.0810802	0.0919464	10	401
55.8916	1531.93	344.868	493.256	7.582	0.0511355	0.0557737	10	401
55.9016	1968.01	519.802	644.015	7.54003	0.0557958	0.0592155	10	401
55.9067	817.943	182.315	240.981	7.73635	0.0462915	0.0485691	10	401
55.9198	797.703	246.889	451.459	7.74277	0.0770592	0.0860897	10	401
55.939	1171.59	272.308	366.06	7.66064	0.0511703	0.0516995	10	401
55.9608	897.571	195.646	251.565	7.7181	0.0446347	0.0499197	10	401
55.9779	818.15	172.594	240.194	7.73815	0.0422389	0.0500921	10	401
56.0242	961.126	237.675	294.13	7.7018	0.0522958	0.0525879	10	401
56.0404	1287.63	298.703	360.944	7.63957	0.0475446	0.0497764	10	401
56.0518	804.646	170.939	210.476	7.74134	0.0400975	0.0463287	10	401
56.1021	1089.65	262.587	329.182	7.67888	0.0535524	0.0514958	10	401
56.1346	817.217	170.94	270.366	7.73447	0.0502915	0.0506827	10	401
56.3369	545.946	138.709	231.992	7.81873	0.0582979	0.0676536	10	401
53.963	809.844	150.741	197.408	7.72637	0.0374008	0.0366829	9	1210
53.9693	577.158	93.4212	124.366	7.80992	0.036777	0.0340172	9	1210
54.0078	871.737	176.351	213.785	7.73531	0.0435825	0.0411911	9	1210
54.0381	1213.85	232.327	324.441	7.6611	0.045028	0.0397905	9	1210
54.0441	980.171	160.079	173.659	7.68923	0.0312596	0.0276924	9	1210
54.0477	743.948	122.624	136.982	7.75855	0.0295421	0.0293026	9	1210
54.05	646.564	100.312	129.57	7.78314	0.0309405	0.0310888	9	1210
54.0508	746.848	142.833	178.965	7.74933	0.0415972	0.0380852	9	1210
54.0515	815.477	153.195	193.954	7.751	0.0387958	0.0372124	9	1210
54.0526	645.174	102.365	127.471	7.79091	0.0305887	0.0339288	9	1210
54.0541	564.283	97.8794	118.086	7.8321	0.0356997	0.0357322	9	1210
54.0604	495.409	93.442	123.197	7.86048	0.0392996	0.0386339	9	1210
54.0803	570.328	98.2348	114.99	7.82922	0.0351271	0.0319919	9	1210
53.9422	695.338	159.208	177.886	7.7083	0.0384518	0.0400013	9	1265
53.9526	1053.52	230.253	285.353	7.61411	0.0378473	0.0413321	9	1265
53.9633	886.884	234.766	309.647	7.65552	0.0590943	0.0528452	9	1265
53.9741	1002.19	343.592	550.178	7.6234	0.092494	0.0771303	9	1265
53.9866	1089.96	313.173	415.606	7.60961	0.0620721	0.0571188	9	1265
54.0174	1305.17	345.659	473.521	7.56774	0.055795	0.0497015	9	1265
54.0268	1498.24	345.198	403.298	7.53843	0.0427254	0.040315	9	1265
54.039	875.376	210.558	215.408	7.65546	0.0432157	0.0420786	9	1265
54.0469	488.184	141.916	185.695	7.78316	0.0675344	0.0615151	9	1265
54.0472	606.567	181.393	272.294	7.72849	0.0689281	0.0665325	9	1265
54.049	2335.39	822.326	1704.72	7.43574	0.114676	0.0920978	9	1265
54.0497	1213.46	288.771	371.631	7.5758	0.0469388	0.0453566	9	1265
54.0497	995.531	366.165	556.934	7.61813	0.087864	0.0889556	9	1265
54.0502	1025.16	418.199	791.29	7.61217	0.122196	0.103528	9	1265
54.0514	1389.13	442.059	723.068	7.54215	0.0829847	0.0743779	9	1265
54.0545	578.769	150.938	212.768	7.7483	0.0617684	0.0528016	9	1265
54.0647	482.776	126.137	144.426	7.79637	0.0507028	0.0498377	9	1265
54.0745	547.753	130.293	168.081	7.76374	0.0439781	0.0434172	9	1265
54.088	527.381	183.419	362.214	7.7701	0.0978849	0.0863301	9	1265
56.066	946.364	166.878	191.138	7.72504	0.0336208	0.0324963	9	1209
55.929	684.833	126.902	171.537	7.78911	0.0420155	0.0370171	9	1209
55.919	1091.12	188.686	214.552	7.68951	0.0366164	0.0314587	9	1209
55.8827	1731.84	387.363	489.258	7.54172	0.0507019	0.0503724	9	1209
55.8365	1932.7	395.26	540.284	7.5208	0.0504174	0.0472663	9	1209
55.7975	2037.38	437.028	597.964	7.516	0.053418	0.0462878	9	1209
55.6838	1068.5	178.597	213.597	7.697	0.0298857	0.0289971	9	1209
39.8079	1082	181.038	233.066	7.69876	0.0341917	0.0345022	11	1260
39.911	892.736	136.05	175.427	7.75036	0.0332595	0.0335347	11	1260
39.9827	869.545	145.843	163.343	7.76741	0.033403	0.0323712	11	1260
40.0615	1186.11	202.992	277.372	7.7024	0.0407208	0.0366225	11	1260
40.1109	1201.4	199.636	222.723	7.66491	0.0356055	0.0307583	11	1260
40.2502	958.024	162.731	177.788	7.73095	0.0326628	0.0328584	11	1260
40.3941	945.259	148.795	193.381	7.72096	0.0347752	0.0354231	11	1260
40.5172	942.703	156.928	184.396	7.73199	0.0330205	0.0324945	11	1260
40.6489	901.917	148.563	186.001	7.74333	0.0336666	0.0329356	11	1260
41.0123	1177.72	193.416	241.985	7.67132	0.0330357	0.0379873	11	1260
39.1236	790.913	124.681	150.349	7.76055	0.0322211	0.0323047	11	865
39.3274	900.468	149.332	179.538	7.75189	0.0332911	0.0318595	11	865
39.9581	930.465	150.22	175.613	7.72026	0.0347171	0.0314124	11	865
40.0002	898.211	157.586	172.24	7.72567	0.0339504	0.0352132	11	865
40.0312	1061.34	182.939	211.099	7.68848	0.0327569	0.037919	11	865
40.0922	1370.21	250.322	310.289	7.63096	0.0409076	0.0379629	11	865
40.1397	1407.52	264.288	290.34	7.61705	0.0391574	0.0362909	11	865
40.1397	1350.57	258.508	297.619	7.63512	0.039267	0.0374689	11	865
40.1687	1860.08	366.022	498.807	7.55119	0.046098	0.0419107	11	865
40.2444	939.958	162.009	185.157	7.72702	0.0342159	0.0350146	11	865
40.3094	963.807	167.915	168.178	7.72366	0.0347881	0.0329225	11	865
40.3777	912.712	159.51	181.108	7.73297	0.0379418	0.0339867	11	865
40.5168	1014.27	183.4	221.695	7.7121	0.0355971	0.035816	11	865
40.6292	1135.92	188.871	228.869	7.68558	0.0355341	0.0341128	11	865
40.8103	1096.94	196.298	235.516	7.68964	0.0358483	0.035091	11	865
40.9205	947.576	166.404	182.718	7.72503	0.0344658	0.0368249	11	865
41.1296	865.223	151.043	163.477	7.74376	0.0321875	0.0330569	11	865
41.5295	836.678	143.352	169.68	7.73434	0.0343944	0.0345023	11	865
